# Supplementary material
Source: publisher figshare collection journal article supplement (https://geolsoc.figshare.com/ndownloader/files/21445197)
Supplement: Supplementary file 1 [file 21445197]

## Sheet: KY1501PC13_L
L* data in depth
Total Depth (cm)	L*(D65)
3	43.74
5	45.67
7	43.41
9	44.19
11	45.75
13	45.01
15	49.24
17	45.9
19	45.54
21	45.52
23	43.89
25	42.13
27	45.02
29	43.25
31	42.69
33	44.83
35	42.21
37	38.1
39	39.83
41	39.75
43	39.97
45	37.93
47	40.83
49	38.17
51	37.92
53	37.7
55	36.72
57	39.37
59	36.37
61	38.81
63	37.18
65	37.39
67	38.01
69	38.36
71	39.88
73	39.34
75	38.03
77	37.76
79	39.11
81	38.57
83	38.56
85	40.29
87	41.19
89	39.11
91	41.38
93	41.58
95	38.66
97	39.2
99	ー
101	40.25
103	39.89
105	38.44
107	39.63
109	38.42
111	38.93
113	39.15
115	41.61
117	42.58
119	40.39
121	38.64
123	40.2
125	41.09
127	40.96
129	39.98
131	39.29
133	40.19
135	40.08
137	39.64
139	39.83
141	40.31
143	39.33
145	43.22
147	40.75
149	41.47
151	40.45
153	40.37
155	39.46
157	40.35
159	39.44
161	40.69
163	41.17
165	40.4
167	41.97
169	41.11
171	40.06
173	40.96
175	41.2
177	40.87
179	41.81
181	42.13
183	41.71
185	41.43
187	41.58
189	43.6
191	41.79
193	41.51
195	42.61
197	43.95
199	44.54
199
201	40.11
203	42.27
205	43.15
207	42.66
209	42.49
211	41.92
213	42.15
215	40.95
217	41.36
219	39.58
221	40.7
223	40.42
225	39.14
227	35.25
229	39.54
231	40.18
233	39.78
235	40.98
237	42.14
239	41.71
241	40.37
243	40.16
245	40.18
247	39.79
249	40.15
251	40.61
253	40.5
255	40.37
257	40.07
259	41.39
261	40.67
263	41.21
265	40.24
267	41.26
269	41.41
271	41.36
273	40.89
275	40.79
277	40.99
279	42.1
281	41.32
283	42.83
285	43.9
287	42.51
289	42.69
291	46.88
293	46.39
295	43.95
297	47.81
299	ー
301	48.8
303	45.79
305	45.97
307	46.19
309	46.75
311	47.34
313	47.9
315	47.53
317	48.96
319	47.43
321	47.83
323	50.06
325	48.12
327	47.23
329	47.95
331	46.78
333	46.37
335	46.53
337	45.09
339	42.74
341	41.96
343	41.34
345	42.08
347	44.22
349	45
351	44.41
353	45.32
355	44.46
357	45.53
359	45.25
361	45.13
363	45.56
365	46.7
367	45.78
369	46.95
371	46.05
373	47.57
375	47.56
377	48.25
379	48.05
381	48.45
383	48.4
385	48.03
387	45.49
389	47.55
391	49.04
393	49.88
395	50.56
397	51.3
398.3	ー
400.3	50.51
402.3	50.34
404.3	50.59
406.3	42.82
408.3	48.82
410.3	46.7
412.3	47.22
414.3	46.67
416.3	46.62
418.3	45.31
420.3	45.1
422.3	45.03
424.3	44.45
426.3	44.12
428.3	43.27
430.3	45.45
432.3	47.27
434.3	45.3
436.3	46.42
438.3	46.65
440.3	46.74
442.3	47.88
444.3	48.26
446.3	48.67
448.3	48.05
450.3	47.77
452.3	48.76
454.3	47.27
456.3	49.22
458.3	47.76
460.3	48.72
462.3	49.75
464.3	47.07
466.3	48.39
468.3	48.66
470.3	48.01
472.3	48.27
474.3	47.83
476.3	46.66
478.3	45.51
480.3	41.82
482.3	42.23
484.3	41.3
486.3	44.1
488.3	43.62
490.3	37.56
492.3	43.37
494.3	44.93
497.1	ー
